# Supplementary material
Source: PubMed Central journal article supplement (PMC4226080)
Supplement: pnas.201413550SI.pdf [file pnas.201413550SI.pdf]

# Supporting Information

Lewis et al. 10.1073/pnas.1413550111

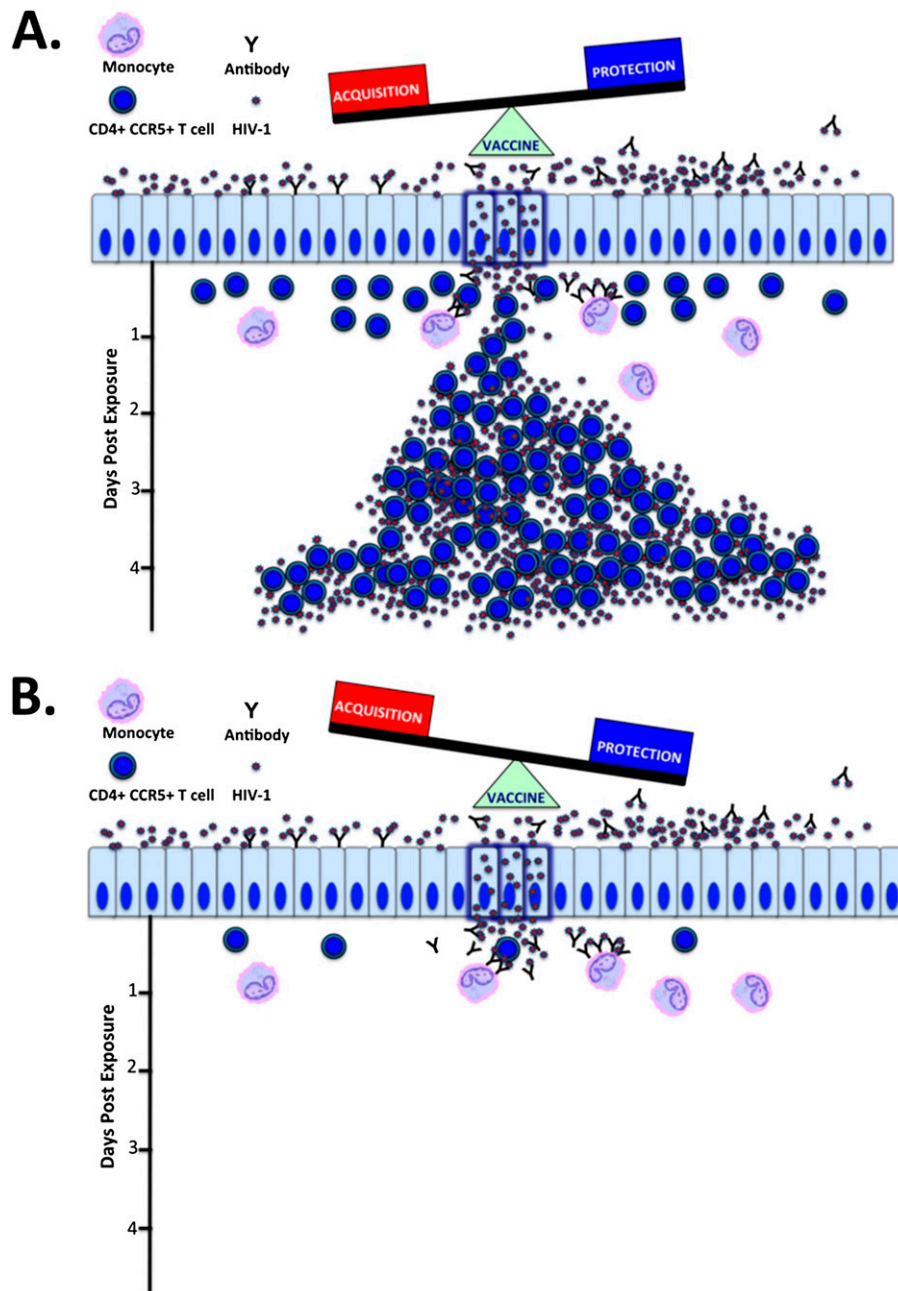

**Fig. S1.** Tipping the balance between acquisition and protection by vaccination. (A) Acquisition under conditions where the vaccine elicits mucosal CD4<sup>+</sup> CCR5<sup>+</sup> T cells that are present at the time of exposure is depicted. The frequency of these cells overwhelms the protective antibody response at the mucosal site. (B) Protection where the protective antibody response is not attenuated by vaccine-elicited CD4<sup>+</sup> CCR5<sup>+</sup> T cells is depicted.
